# Supplementary material for: Heterogeneous mutation pattern in tumor tissue and circulating tumor DNA warrants parallel NGS panel testing
Source: Mol Cancer. 2018 Aug 28;17:131. doi: 10.1186/s12943-018-0875-0 (PMC6114875; doi:10.1186/s12943-018-0875-0)
Supplement: Supplementary file 3 — Table S2. Somatic alterations detected in cfDNA of NSCLC patients. (XLSX 13 kb) [file 12943_2018_875_MOESM3_ESM.xlsx]

## Sheet: Table S2 ctDNA Alterations
Table S2. Somatic alterations detected in cfDNA of NSCLC patients.
Patient	Variant type	Consequence	Gene	HGVSc	HGVSp	VAF(%)	No. of variant UID family	No. of total UID family	ddPCR(%)
1	SNV	missense_variant	TP53	NM_000546.5:c.329G>A	NP_000537.3:p.Arg110His	0.58	2.98	514	0.05
1	SNV	missense_variant	TP53	NM_000546.5:c.869G>A	NP_000537.3:p.Arg290His	0.22	3.03	1377	0.2
3	SNV	missense_variant	BRAF	NM_004333.4:c.1331G>A	NP_004324.2:p.Arg444Gln	0.34	2.98	877	Not tested
3	SNV	missense_variant	ERBB2	NM_004448.2:c.2265G>T	NP_004439.2:p.Leu755Phe	0.26	2.04	783	Not tested
4	SNV	missense_variant	BRAF	NM_004333.4:c.1406G>C	NP_004324.2:p.Gly469Ala	0.28	5.95	2125	0.1
6	SNV	missense_variant	TP53	NM_000546.5:c.817C>T	NP_000537.3:p.Arg273Cys	0.09	0a	501	0.22
7	SNV	missense_variant	DDR2	NM_006182.2:c.1390G>A	NP_006173.2:p.Glu464Lys	0.11	1	913	0.31
10	SNV	missense_variant	TP53	NM_000546.5:c.524G>A	NP_000537.3:p.Arg175His	0.27	2.02	748	0
10	SNV	splice_acceptor_variant	TP53	NM_000546.5:c.673-2A>G	Not available	0.22	6.99	3176	1.56
11	SNV	missense_variant	PTEN	NM_000314.4:c.397G>A	NP_000305.3:p.Val133Ile	0.35	4.06	1159	Not tested
11	SNV	missense_variant	TP53	NM_000546.5:c.392A>T	NP_000537.3:p.Asn131Ile	3.65	62	1700	Not tested
11	SNV	missense_variant	TP53	NM_000546.5:c.475G>A	NP_000537.3:p.Ala159Thr	0.5	2.01	402	0.06
11	SNV	missense_variant	TP53	NM_000546.5:c.707A>G	NP_000537.3:p.Tyr236Cys	3.5	91	2600	Not tested
11	SNV	missense_variant	PIK3CA	NM_006218.2:c.1192C>A	NP_006209.2:p.Arg398Ser	3.55	30.99	873	Not tested
13	SNV	missense_variant	PTEN	NM_000314.4:c.397G>A	NP_000305.3:p.Val133Ile	0.41	4.03	983	Not tested
13	Deletion	inframe_deletion	EGFR	NM_005228.3:c.2236_2250delGAATTAAGAGAAGCA	NP_005219.2:p.Glu746_Ala750del	1.03	6.99	679	0.95
13	SNV	missense_variant	EGFR	NM_005228.3:c.2374C>A	NP_005219.2:p.Leu792Ile	0.51	14.04	2753	Not tested
14	SNV	missense_variant	KRAS	NM_004985.3:c.34G>T	NP_004976.2:p.Gly12Cys	0.27	2	741	0.53
16	SNV	missense_variant	EGFR	NM_005228.3:c.2573T>G	NP_005219.2:p.Leu858Arg	0.04	0.96	2404	0.2
17	SNV	stop_gained	MAP2K1	NM_002755.3:c.184G>T	NP_002746.1:p.Glu62Ter	0.2	3.03	1517	Not tested
17	SNV	missense_variant	EGFR	NM_005228.3:c.2573T>G	NP_005219.2:p.Leu858Arg	0.09	1	1108	0.28
19	SNV	missense_variant	BRAF	NM_004333.4:c.1789C>A	NP_004324.2:p.Leu597Ile	0.2	2	998	Not tested
20	SNV	stop_gained	TP53	NM_000546.5:c.586C>T	NP_000537.3:p.Arg196Ter	0.71	16.07	2263	1.35
20	Insertion	frameshift_variant	TP53	NM_000546.5:c.681dupT	NP_000537.3:p.Asp228Ter	0.27	11.02	4081	0.94
22	SNV	missense_variant	EGFR	NM_005228.3:c.2293G>A	NP_005219.2:p.Val765Met	2.32	35.98	1551	Not tested
24	SNV	missense_variant	ALK	NM_004304.4:c.3542G>A	NP_004295.2:p.Arg1181His	16.78	96.99	578	Not tested
29	SNV	missense_variant	TP53	NM_000546.5:c.1079G>C	NP_000537.3:p.Gly360Ala	7.13	63.03	884	Not tested
41	SNV	missense_variant	TP53	NM_000546.5:c.634T>G	NP_000537.3:p.Phe212Val	0.73	7	954	Not tested
41	SNV	missense_variant	KRAS	NM_004985.3:c.35G>C	NP_004976.2:p.Gly12Ala	0.9	7	778	Not tested
41	SNV	missense_variant	PIK3CA	NM_006218.2:c.323G>A	NP_006209.2:p.Arg108His	0.26	2	771	Not tested
aThis mutation was manually confirmed to be true though all raw unique identifiers was filtered out due to low coverage. In the current software setting, any UID family should contain at least five reads. In the future, we will use dynamic cutoffs to better reflect the effect of low coverage data on UID families.
